# Supplementary material for: Synthesis and characterization of Co2−xRhxP nanoparticles and their catalytic activity towards the oxygen evolution reaction
Source: Royal Society of Chemistry journal article supplement (doi:10.1039/c8ta02016g), 2018-01-01
Supplement: c8ta02016g1.pdf [file c8ta02016g1.pdf]

## Electronic Supplemental Information

### SYNTHESIS AND CHARACTERIZATION OF $\text{Co}_{2-x}\text{Rh}_x\text{P}$ NANOPARTICLES AND THEIR CATALYTIC ACTIVITY TOWARDS THE OXYGEN EVOLUTION REACTION.

Samuel Mutinda, Da Li, Jacob Kay and Stephanie L. Brock(  
Wayne State University, Detroit, MI 48202  
\*E-mail: [sbrock@chem.wayne.edu](mailto:sbrock@chem.wayne.edu)

**Table S1:** Phosphidation parameters for different compositions of  $\text{Co}_{2-x}\text{Rh}_x\text{P}$  nanoparticles.

| Target composition                         | Phosphidation temperature (°C) | Phosphidation duration (hours) |
|--------------------------------------------|--------------------------------|--------------------------------|
| $\text{Co}_{1.9}\text{Rh}_{0.1}\text{P}$   | 305                            | 1                              |
| $\text{Co}_{1.75}\text{Rh}_{0.25}\text{P}$ | 310                            | 3                              |
| $\text{Co}_{1.5}\text{Rh}_{0.5}\text{P}$   | 330                            | 3                              |
| $\text{Co}_{1.25}\text{Rh}_{0.75}\text{P}$ | 330                            | 3                              |
| $\text{Co}_1\text{Rh}_1\text{P}$           | 330                            | 3                              |
| $\text{Co}_{0.75}\text{Rh}_{1.25}\text{P}$ | 350                            | 3                              |
| $\text{Co}_{0.5}\text{Rh}_{1.5}\text{P}$   | 350                            | 3                              |

**Table S2:** A summary of EDX Data for  $\text{Co}_{2-x}\text{Rh}_x\text{P}$  nanoparticles

| Targeted Composition                       | Calculated Composition                            |
|--------------------------------------------|---------------------------------------------------|
| $\text{Co}_{1.75}\text{Rh}_{0.25}\text{P}$ | $\text{Co}_{1.78}\text{Rh}_{0.22}\text{P}_{1.31}$ |
| $\text{Co}_{1.5}\text{Rh}_{0.5}\text{P}$   | $\text{Co}_{1.52}\text{Rh}_{0.48}\text{P}_{1.74}$ |
| $\text{Co}_{1.25}\text{Rh}_{0.75}\text{P}$ | $\text{Co}_{1.18}\text{Rh}_{0.82}\text{P}_{2.10}$ |
| $\text{Co}_1\text{Rh}_1\text{P}$           | $\text{Co}_{1.10}\text{Rh}_{0.90}\text{P}_{0.73}$ |
| $\text{Co}_{0.75}\text{Rh}_{1.25}\text{P}$ | $\text{Co}_{0.84}\text{Rh}_{1.16}\text{P}_{0.64}$ |
| $\text{Co}_{0.5}\text{Rh}_{1.5}\text{P}$   | $\text{Co}_{0.59}\text{Rh}_{1.41}\text{P}_{0.77}$ |

**Table S3:** Summary of fitted peak positions, particle size, and d-spacing for  $\text{Co}_{2-x}\text{Rh}_x\text{P}$  nanoparticles where  $x \geq 1$  (antifluorite structure).

| Target composition                         | (220) Peak position ( $2\theta$ ) | d-spacing (Å)     | Crystallite size (nm) |
|--------------------------------------------|-----------------------------------|-------------------|-----------------------|
| $\text{Co}_1\text{Rh}_1\text{P}$           | $47.696 \pm 0.002$                | $1.906 \pm 0.002$ | $5.2 \pm 0.2$         |
| $\text{Co}_{0.75}\text{Rh}_{1.25}\text{P}$ | $47.362 \pm 0.034$                | $1.918 \pm 0.003$ | $5.1 \pm 0.2$         |
| $\text{Co}_{0.5}\text{Rh}_{1.5}\text{P}$   | $47.129 \pm 0.026$                | $1.927 \pm 0.002$ | $5.7 \pm 0.2$         |
| $\text{Rh}_2\text{P}$                      | $46.764 \pm 0.015$                | $1.941 \pm 0.001$ | $4.4 \pm 0.1$         |

**Table S4: ICP-MS Data for  $\text{Co}_{1.75}\text{Rh}_{0.25}\text{P}$  nanoparticles before and after OER catalysis**

| Sample                | Co (molar ratio) | Rh (molar ratio) | P (molar ratio)       |
|-----------------------|------------------|------------------|-----------------------|
| As-prepared sample    | 1.8              | 0.2              | 1.5                   |
| Post-catalysis sample | 1.8              | 0.2              | Below Detection Limit |

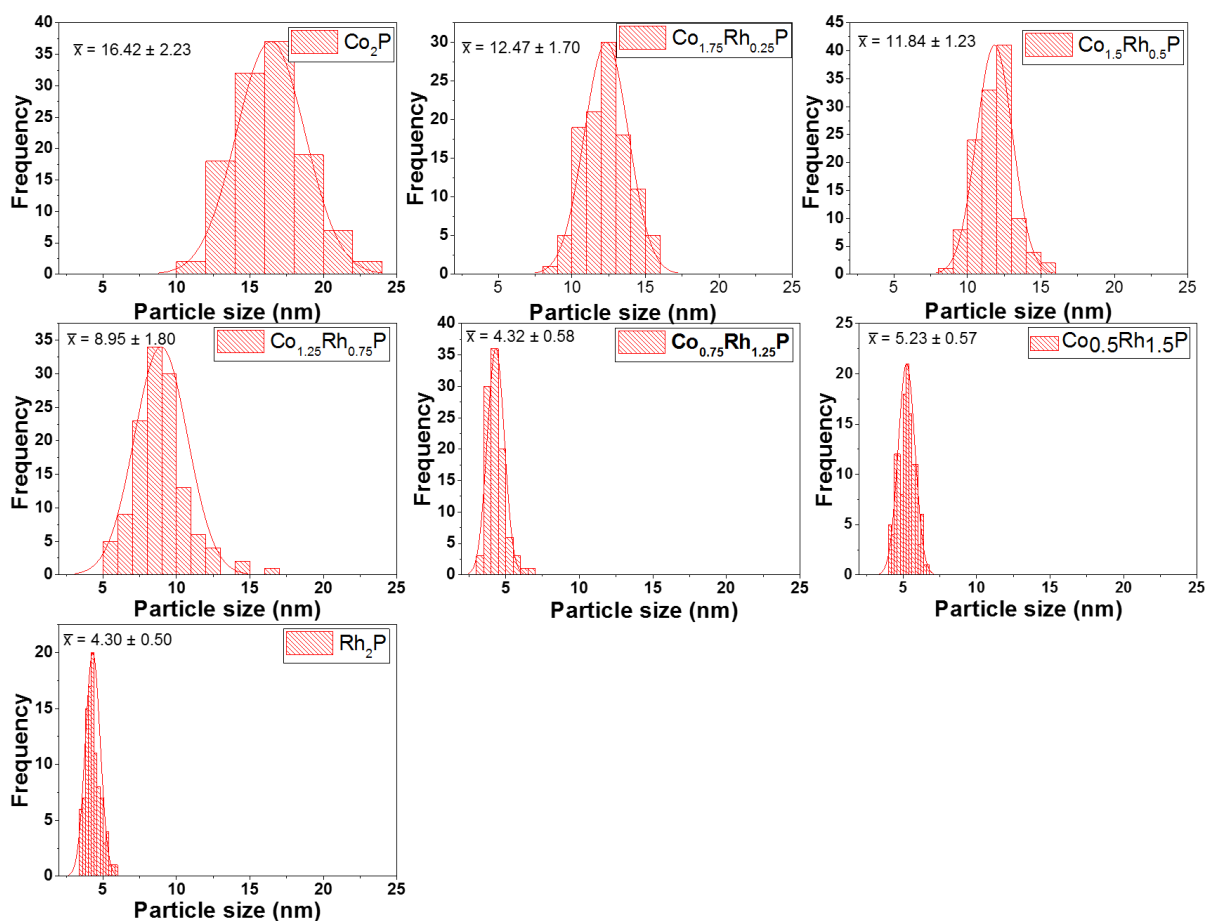

**Fig. S1:** A compilation of histograms derived from TEM data for different  $\text{Co}_{2-x}\text{Rh}_x\text{P}$  compositions. Data for the  $\text{Co}_1\text{Rh}_1\text{P}$  target composition was not included here due to a high degree of polydispersity and phase segregation.

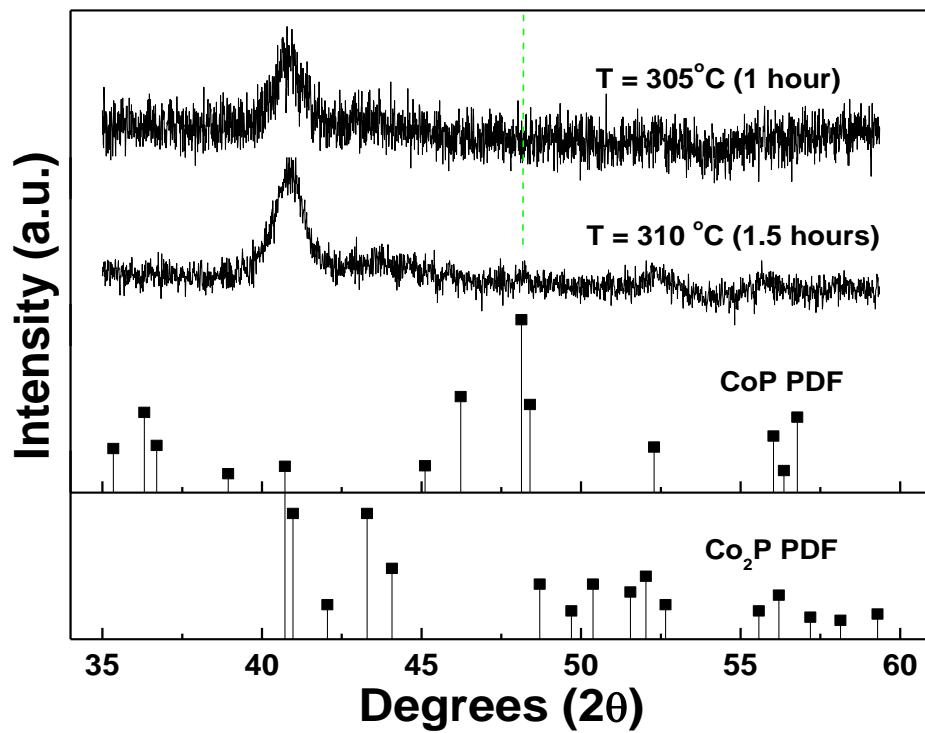

**Fig. S2:** PXR D data for  $\text{Co}_{1.9}\text{Rh}_{0.1}\text{P}$  target composition under slightly different phosphidation conditions. A small  $\text{CoP}$  (211) peak can be seen in the sample that was phosphided at  $310^\circ\text{C}$ .
